# Supplementary material
Source: publisher figshare collection journal article supplement (https://future-science-group.figshare.com/ndownloader/files/39595009)
Supplement: Supplementary file 1 [file 39595009]

| **Study** | **Appendix samples analyzed, n** | **Appendix samples with preoperative antibiotics, n** | **Samples from healthy appendices** | **Samples from Interval appendectomies** | **Samples from uncomplicated appendicitis** | **Samples from complicated appendicitis** |
| --- | --- | --- | --- | --- | --- | --- |
| **Guinane [40], 2013** | 7 | 7 |  |  | Amoxicillin-Clavulanate (one case with additional gentamicin, one case with additional gentamicin + metronidazole |  |
| **Zhong [28], 2013** | 22 | 22 | one preoperative dose of broad-spectrum antibiotics | one preoperative dose of broad-spectrum antibiotics | one preoperative dose of broad-spectrum antibiotics | one preoperative dose of broad-spectrum antibiotics |
| **Jackson [39], 2014** | 21 | 21 | Ertapenem (5/6 samples), Cefazolin (1/6 sample) | NA | Ertapenem (5/6 samples) Ampicillin-Sulbactam (1/6 sample) | Ertapenem (8/9 samples) Ampicillin-Sulbactam (1/9 sample) |
| **Arlt [42], 2015** | 8 | Unknown | NA | NA | NA | NA |
| **Rogers [35], 2015** | 85 | Unknown |  | 10-14 days of Ertapenem |  |  |
| **Schülin [33], 2017** | 16 | 2 | NA | NA | NA | Cefotaxime and Metronidazole or Piperacillin-Tazobactam |
| **Salö [34], 2017** | 22 | 22 | trimethoprim/sulfamethoxazole + metronidazole. |  | trimethoprim/sulfamethoxazole + metronidazole. | trimethoprim/sulfamethoxazole + metronidazole. |
| **Sarah-May [29], 2019** | 36 | 36 |  |  | metronidazole + cephalosporin or cefuroxime. Or Amoxicillin-clavulanic acid + gentamicin | metronidazole + cephalosporin or cefuroxime. Or Amoxicillin-clavulanic acid + gentamicin |
| **Peeters [36], 2019** | 90 | 90 |  |  | Not specified | Not specified |
| **Oh [37], 2020** | 85 | 85 | Not specified |  | Not specified |  |

Supplementary table S1 specifying administration of preoperative antibiotic treatment.
